# Supplementary material for: First homoleptic MIC and heteroleptic NHC–MIC coordination cages from 1,3,5-triphenylbenzene-bridged tris-MIC and tris-NHC ligands
Source: Royal Society of Chemistry journal article supplement (doi:10.1039/c5cc05114b), 2015-01-01
Supplement: c5cc05114b1.pdf [file c5cc05114b1.pdf]

**Supporting information for:**  
**First homoleptic MIC and heteroleptic NHC-MIC coordination  
cages from 1,3,5-triphenylbenzene-bridged tris-MIC and tris-NHC  
ligands**

Carmen Mejuto, Gregorio Guisado-Barrios, Dmitry Gusev and Eduardo Peris

**General methods**

**1. Synthesis and characterization of the metal complexes**

- 1.1. Synthesis of salt **1**
- 1.2. Synthesis of metal complex **2**
- 1.3. Synthesis of metal complex **3**
- 1.4. Synthesis of metal complex **6**

**2. Spectra**

- 2.1.  $^1\text{H}$  and  $^{13}\text{C}$  NMR spectra of **1**
- 2.2.  $^1\text{H}$  and  $^{13}\text{C}$  NMR spectra of **2**
- 2.3.  $^1\text{H}$  and  $^{13}\text{C}$  NMR spectra of **3**
- 2.4.  $^1\text{H}$  and  $^{13}\text{C}$  NMR spectra of **6**

**3. ESI Mass spectrum of 6**

**4. X-Ray Diffraction studies**

**4. Computational details**

**5. References**

**General methods.** The 1,3,5-triphenylbenzene-bridged-tris-imidazolium salt **5** and the metal complex **4** were synthesized as previously reported.<sup>1</sup> 1,3,5-Tris(4-ethynylphenyl)benzene was obtained as described in the literature.<sup>2</sup> All manipulations were performed under nitrogen atmosphere using standard Schlenk techniques. Solvents were dried using a solvent purification system (MBraun SPS). All reagents were used as received from commercial suppliers. NMR spectra were recorded on Varian Innova 300 and 500 MHz spectrometers, using CDCl<sub>3</sub> and CD<sub>2</sub>Cl<sub>2</sub> as solvents. Electrospray mass spectra (ESI-MS) were recorded on a Micromass Quatro LC instrument; nitrogen was employed as drying and nebulizing gas. Accurate mass measurements were performed by use of a Q-TOF premier mass spectrometer with electrospray source (Waters, Manchester, UK) operating at a resolution of ca. 16 000 (fwhm). Elemental analyses were carried out on a EuroEA3000 Eurovector Analyzer.

**Synthesis of the 1,3,5-triphenylbenzene-bridged tris-(1,2,3)triazolium salt 1** In a Schlenk tube, a mixture of wrapped with aluminum foil containing 1,3,5-tris-(4-ethynylphenyl)benzene (270 mg, 0.71 mmol), 1,3-dimesityltriazene (1.50 g, 4.10 mmol) and KPF<sub>6</sub> (990 mg, 5.38 mmol) in CH<sub>2</sub>Cl<sub>2</sub> was cooled down to -78 °C and stirred during 30 minutes. Then <sup>t</sup>BuOCl (486 mg, 0.53 mmol) was added dropwise over the period of one hour at -78 °C, and the reaction mixture was stirred at -78 °C during 6 hours. The reaction was allowed to slowly warm up and stirred at room temperature overnight. The resulting solution was filtrated, and the filtrate was evaporated. The resulting white solid was washed with diethyl ether and MeOH (yield: 1.1 g, 93%). <sup>1</sup>H NMR (300 MHz, CDCl<sub>3</sub>): δ (ppm) 9.08 (s, 3H, CHN), 7.77 (m, 9H, CH<sub>Ar</sub>), 7.60 (m, 6H, CH<sub>Ar</sub>), 7.14 (d, 12H, *J*= 6Hz CH<sub>Ar</sub>), 2.43 (bs, 18H, CH<sub>3</sub>), 2.22 (bs, 18H, CH<sub>3</sub>), 2.06 (bs, 18H, CH<sub>3</sub>). <sup>13</sup>C {<sup>1</sup>H} NMR (75 MHz, CDCl<sub>3</sub>): δ (ppm) 144.7 (C<sub>Ar</sub>), 144.0 (C<sub>Ar</sub>), 143.9 (C<sub>Ar</sub>), 143.1 (C<sub>Ar</sub>), 140.7 (C<sub>Ar</sub>), 134.4 (C<sub>Ar</sub>), 134.1 (C<sub>Ar</sub>), 131.3 (NCHN), 130.8 (C<sub>Ar</sub>), 130.2 (C<sub>Ar</sub>), 128.7 (C<sub>Ar</sub>), 126.0 (C<sub>Ar</sub>), 120.68 (C<sub>Ar</sub>), 21.48 (CH<sub>3</sub>), 21.40 (CH<sub>3</sub>), 17.46 (CH<sub>3</sub>), 17.28 (CH<sub>3</sub>). ESI-MS(+) *m/z* calcd. for [M]<sup>3+</sup>: 406,6; [MPF<sub>6</sub>]<sup>2+</sup>: 682,5. Elemental analysis calcd (%) for C<sub>84</sub>H<sub>84</sub>N<sub>9</sub>P<sub>3</sub>F<sub>18</sub>·3CH<sub>2</sub>Cl<sub>2</sub>: C, 54.7; H, 4.7; N, 6.6 found C, 54.3; H, 5.0; N, 7.2.

**Synthesis of compound 2.** A mixture of **1** (100 mg, 0.085 mmol) and Ag<sub>2</sub>O (30 mg, 0.13 mmol) in MeOH (7 mL) was heated at 60 °C overnight under exclusion of light. After cooling the reaction mixture to room temperature, the suspension was filtered through a pad of celite. The pad of celite was then washed with

CH<sub>2</sub>Cl<sub>2</sub> to yield a clear solution, which was concentrated to dryness yielding a white solid. (yield: 114 mg, 42%). <sup>1</sup>H NMR (300 MHz, CD<sub>2</sub>Cl<sub>2</sub>): δ (ppm) 7.53-7.35 (m, 30H, CH<sub>Ar</sub>), 7.06-7.00 (m, 24H, CH<sub>Ar</sub>), 2.54 (bs, 18H, CH<sub>3</sub>), 2.34 (bs, 18H, CH<sub>3</sub>), 2.04 (bs, 72H, CH<sub>3</sub>). <sup>13</sup>C{<sup>1</sup>H} NMR (75 MHz, CD<sub>2</sub>Cl<sub>2</sub>): δ (ppm) 169.7 (dd, *J* (C-Ag<sup>107</sup>) = 165.0 Hz, *J* (C-Ag<sup>109</sup>) = 190.5 Hz, C<sub>carbene</sub>), 150.31 (C<sub>Ar</sub>), 150.14 (C<sub>Ar</sub>), 142.58 (C<sub>Ar</sub>), 141.16 (C<sub>Ar</sub>), 140.95 (C<sub>Ar</sub>), 139.77 (C<sub>Ar</sub>), 136.81 (C<sub>Ar</sub>), 134.33 (C<sub>Ar</sub>), 131.84 (C<sub>Ar</sub>), 130.43 (C<sub>Ar</sub>), 129.78 (C<sub>Ar</sub>), 129.34 (C<sub>Ar</sub>), 127.13 (C<sub>Ar</sub>), 123.86 (C<sub>Ar</sub>), 21.83 (CH<sub>3</sub>), 21.50 (CH<sub>3</sub>), 17.87 (CH<sub>3</sub>). ESI-MS(+) *m/z* calcd. for [M]<sup>3+</sup>: 919,2; [MPF<sub>6</sub>]<sup>2+</sup>: 1451,2. Elemental analysis calcd (%) for C<sub>168</sub>H<sub>162</sub>N<sub>18</sub>Ag<sub>3</sub>P<sub>3</sub>F<sub>18</sub>: C, 63.2; H, 5.1; N, 7.8 found C, 63.4; H, 5.3; N, 7.3.

**Synthesis of compound 3.** A solution of **2** (55 mg, 0.017 mmol) and [AuCl(SMe<sub>2</sub>)] (32 mg, 0.109 mmol) in acetonitrile (8 mL) was stirred at room temperature for 5 days. The resulting suspension was filtered through a pad of celite. The pad of celite was washed with CH<sub>2</sub>Cl<sub>2</sub> to yield a clear solution, which was concentrated to dryness yielding a white solid. (yield: 38 mg, 58%). <sup>1</sup>H NMR (300 MHz, CD<sub>2</sub>Cl<sub>2</sub>): δ (ppm) 7.84 (sb, 6H, CH<sub>Ar</sub>), 7.77-7.69 (bs, 24H, CH<sub>Ar</sub>), 7.14-7.08 (m, 24H, CH<sub>Ar</sub>), 2.43-2.39 (m, 36H, CH<sub>3</sub>), 2.20 (bs, 36H, CH<sub>3</sub>), 2.05 (bs, 36H, CH<sub>3</sub>). <sup>13</sup>C{<sup>1</sup>H} NMR (75 MHz, CD<sub>2</sub>Cl<sub>2</sub>): δ (ppm) 161.1 (Au-C<sub>carbene</sub>), 147.9 (C<sub>Ar</sub>), 142.7 (C<sub>Ar</sub>), 141.8 (C<sub>Ar</sub>), 141.8 (C<sub>Ar</sub>), 136.4 (C<sub>Ar</sub>), 135.0 (C<sub>Ar</sub>), 134.8 (C<sub>Ar</sub>), 131.8 (C<sub>Ar</sub>), 130.5 (C<sub>Ar</sub>), 130.0 (C<sub>Ar</sub>), 129.6 (C<sub>Ar</sub>), 128.1 (C<sub>Ar</sub>), 126.1 (C<sub>Ar</sub>), 21.7 (CH<sub>3</sub>), 21.6 (CH<sub>3</sub>), 17.9 (CH<sub>3</sub>). ESI-MS(+) *m/z* calcd. for [M]<sup>3+</sup>: 1008,1; [MAuCl<sub>2</sub>]<sup>2+</sup>: 1645,6. Elemental analysis calcd (%) for C<sub>168</sub>H<sub>162</sub>N<sub>18</sub>Au<sub>3</sub>(AuCl<sub>2</sub>)<sub>3</sub>: C, 52.7; H, 4.3; N, 6.6 found C, 53.5; H, 4.7; N, 6.2.

**Synthesis of compound 6.** A mixture of **1** (60 mg, 0.04 mmol), **5** (42 mg, 0.04 mmol) and Ag<sub>2</sub>O (25 mg, 0.11 mmol) in MeOH (7 mL) was heated to 60 °C overnight under exclusion of light. The resulting suspension was filtered through a pad of celite, and washed with CH<sub>2</sub>Cl<sub>2</sub>. Then the filtrate was concentrated to dryness, yielding a white solid (yield: 55 mg, 43%). **Method i.** A mixture of **2** (20 mg, 0.006 mmol) and **4** (12 mg, 0.006 mmol) in MeOH (5 mL) was heated to 60 °C overnight under exclusion of light. The resulting suspension was filtered through a pad of celite and washed with CH<sub>2</sub>Cl<sub>2</sub>. The filtrate was concentrated to dryness obtained a white solid (yield: 45%). **Method ii.** A mixture of **2** (30 mg, 0.015 mmol) and **5** (24 mg, 0.015 mmol) in MeOH (5 mL) was heated to 60 °C overnight under exclusion of light. The resulting suspension

was filtered through a pad of celite and washed with  $\text{CH}_2\text{Cl}_2$ . The filtrate was concentrated to dryness obtained a white solid (yield: 55%). **Method iii.** A mixture of **1** (30 mg, 0.009 mmol) and **4** (10 mg, 0.009 mmol) in MeOH (5 mL) was heated to 60 °C overnight under exclusion of light. The resulting suspension was filtered through a pad of celite and washed with  $\text{CH}_2\text{Cl}_2$ . The filtrate was concentrated to dryness obtained a white solid (yield: 45%).  $^1\text{H}$  NMR (300 MHz,  $\text{CD}_2\text{Cl}_2$ ):  $\delta$  (ppm) 7.65-7.65 (m, 12H,  $\text{CH}_{\text{Ar}}$ ), 7.55 (m, 6H,  $\text{CH}_{\text{Ar}}$ ), 7.46 (m, 12H,  $\text{CH}_{\text{Ar}}$ ), 7.20 (m, 12H,  $\text{CH}_{\text{Ar}}$ ), 7.06 (m, 6H,  $\text{CH}_{\text{Ar}}$ ), 3.72 (m, 6H,  $\text{CH}_2$ ), 2.47 (bs, 9H,  $\text{CH}_3$ ), 2.34 (bs, 9H,  $\text{CH}_3$ ), 2.24 (bs, 18H,  $\text{CH}_3$ ), 2.05 (bs, 9H,  $\text{CH}_3$ ), 2.02 (bs, 18H,  $\text{CH}_3$ ).  $^{13}\text{C}\{^1\text{H}\}$  NMR (75 MHz,  $\text{CD}_2\text{Cl}_2$ ):  $\delta$  (ppm) 180.9-178.1 (dd,  $J(\text{C-Ag}^{107}) = 179.6$  Hz,  $J(\text{C-Ag}^{109}) = 179.4$  Hz,  $\text{C}_{\text{carbene}}$ ), 170.8-168.3 (dd,  $J(\text{C-Ag}^{107}) = 169.6$  Hz,  $J(\text{C-Ag}^{109}) = 169.6$  Hz,  $\text{C}_{\text{carbene}}$ ), 150.2 ( $\text{C}_{\text{Ar}}$ ), 150.0 ( $\text{C}_{\text{Ar}}$ ), 142.5 ( $\text{C}_{\text{Ar}}$ ), 141.9 ( $\text{C}_{\text{Ar}}$ ), 141.6 ( $\text{C}_{\text{Ar}}$ ), 141.0 ( $\text{C}_{\text{Ar}}$ ), 140.6 ( $\text{C}_{\text{Ar}}$ ), 139.8 ( $\text{C}_{\text{Ar}}$ ), 137.3 ( $\text{C}_{\text{Ar}}$ ), 134.9 ( $\text{C}_{\text{Ar}}$ ), 134.7 ( $\text{C}_{\text{Ar}}$ ), 131.5 ( $\text{C}_{\text{Ar}}$ ), 130.3 ( $\text{C}_{\text{Ar}}$ ), 129.8 ( $\text{C}_{\text{Ar}}$ ), 129.0 ( $\text{C}_{\text{Ar}}$ ), 128.7 ( $\text{C}_{\text{Ar}}$ ), 127.7 ( $\text{C}_{\text{Ar}}$ ), 126.5 ( $\text{C}_{\text{Ar}}$ ), 124.7 ( $\text{C}_{\text{Ar}}$ ), 122.6 ( $\text{C}_{\text{Ar}}$ ), 122.6 ( $\text{C}_{\text{Ar}}$ ), 122.0 ( $\text{C}_{\text{Ar}}$ ), 46.6 ( $\text{CH}_2$ ), 21.4 ( $\text{CH}_3$ ), 21.3 ( $\text{CH}_3$ ), 17.7 ( $\text{CH}_3$ ), 17.6 ( $\text{CH}_3$ ), 17.1 ( $\text{CH}_3$ ). ESI-MS(+)  $m/z$  calcd. for  $[\text{M}]^{3+}$ : 709,5;  $[\text{MPF}_6]^{2+}$ : 1136,8. Several attempts to obtain satisfactory elemental analysis of **6** failed, probably due to the large amount of fluorine present, and to the possibility that this cage-type complex retains solvent.

## 2. Spectra

2.1.  $^1\text{H}$  and  $^{13}\text{C}$  NMR spectra of **1**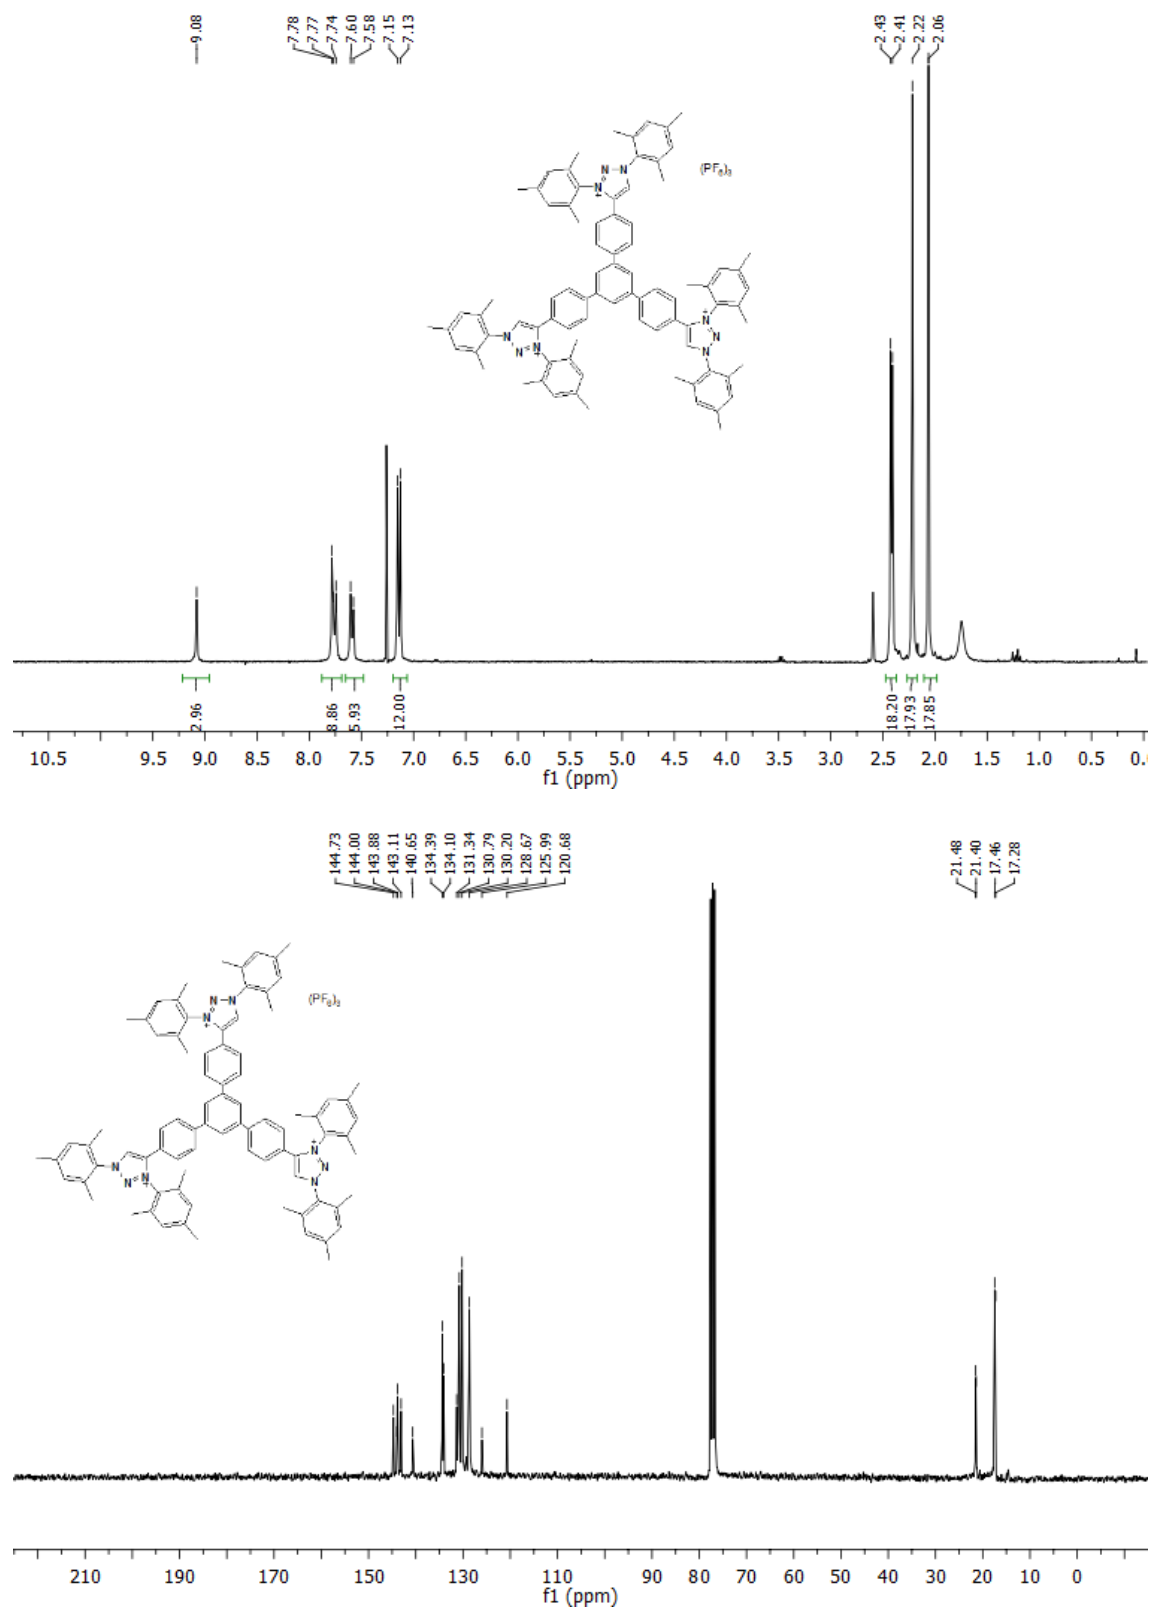

2.2.  $^1\text{H}$  and  $^{13}\text{C}$  NMR spectra of 2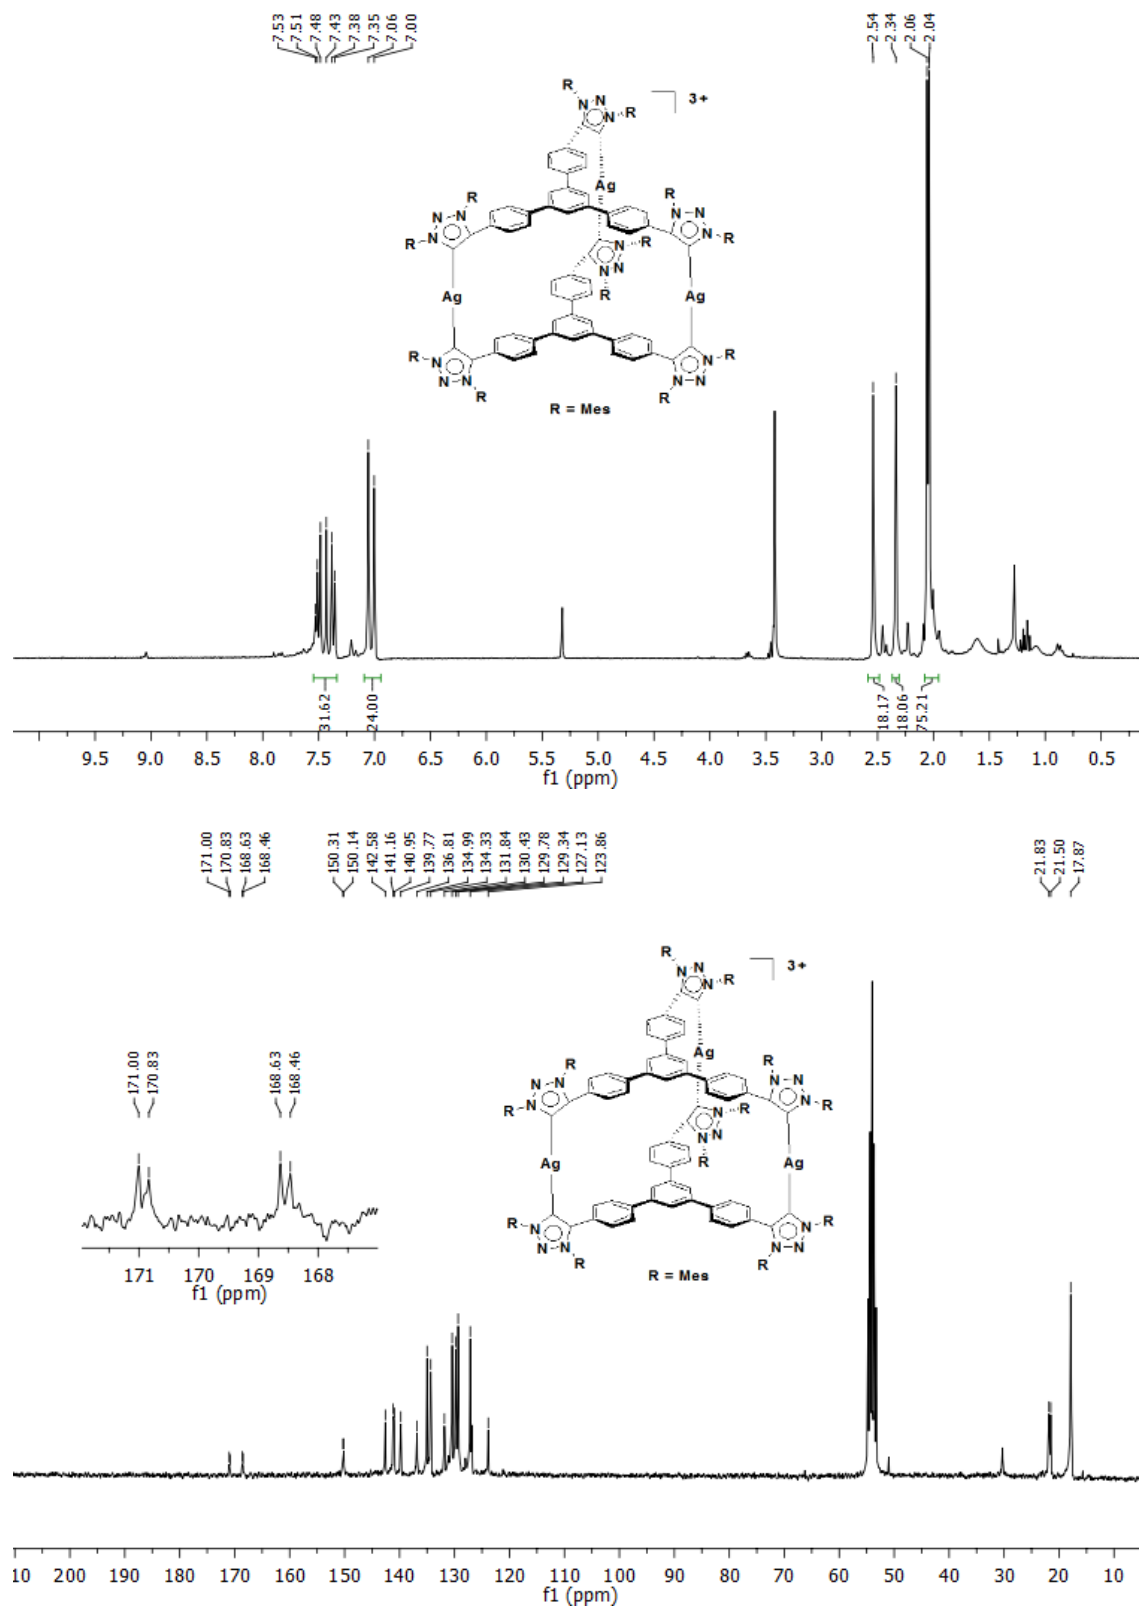

2.3.  $^1\text{H}$  and  $^{13}\text{C}$  NMR spectra of **3**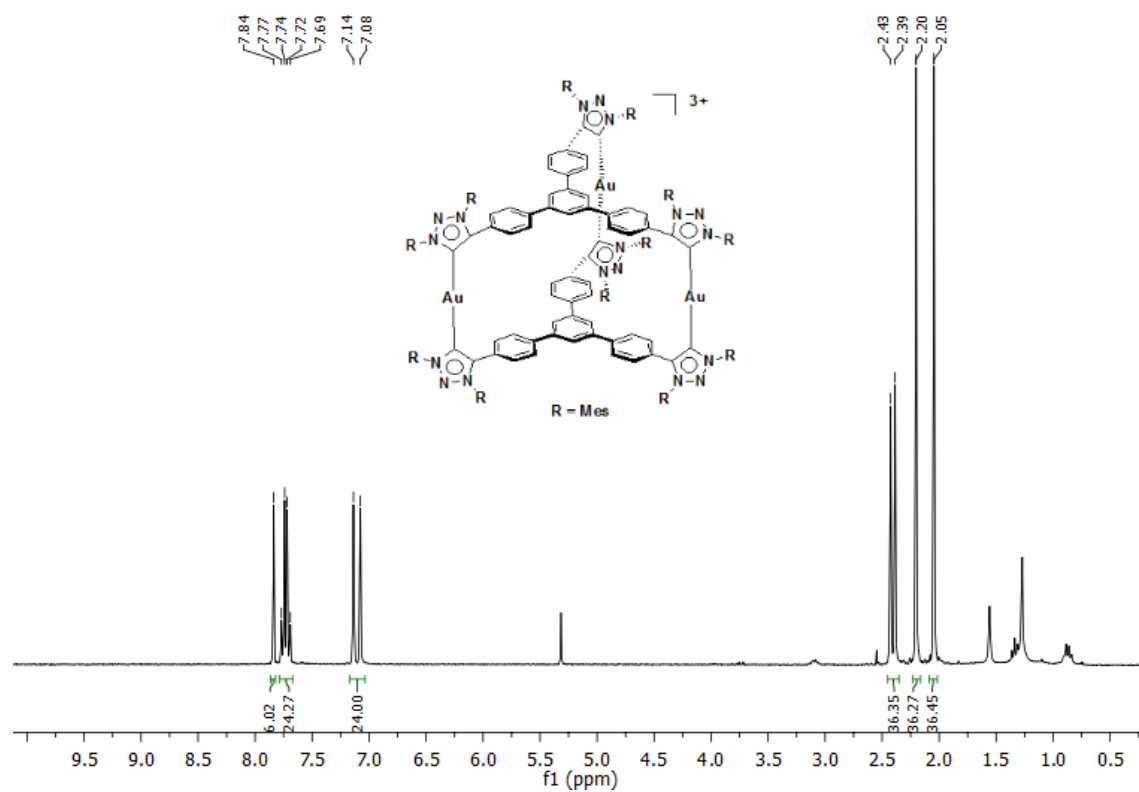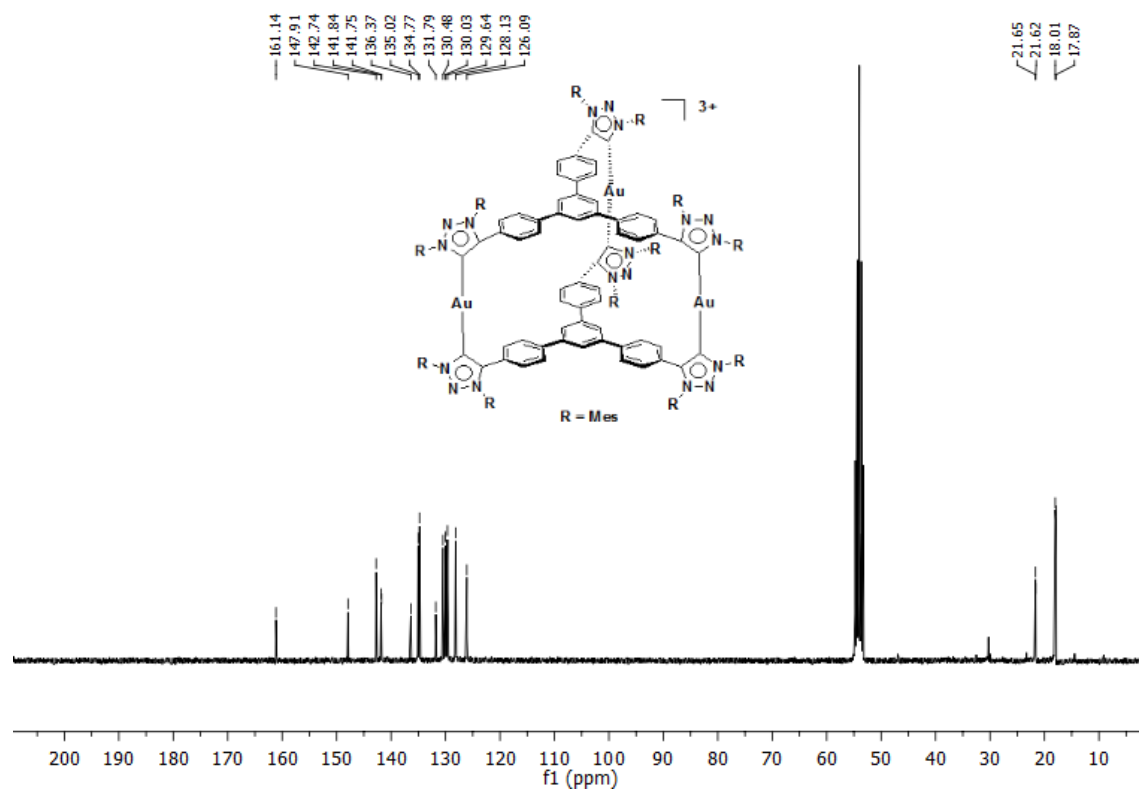

2.4.  $^1\text{H}$  and  $^{13}\text{C}$  NMR spectra of **6**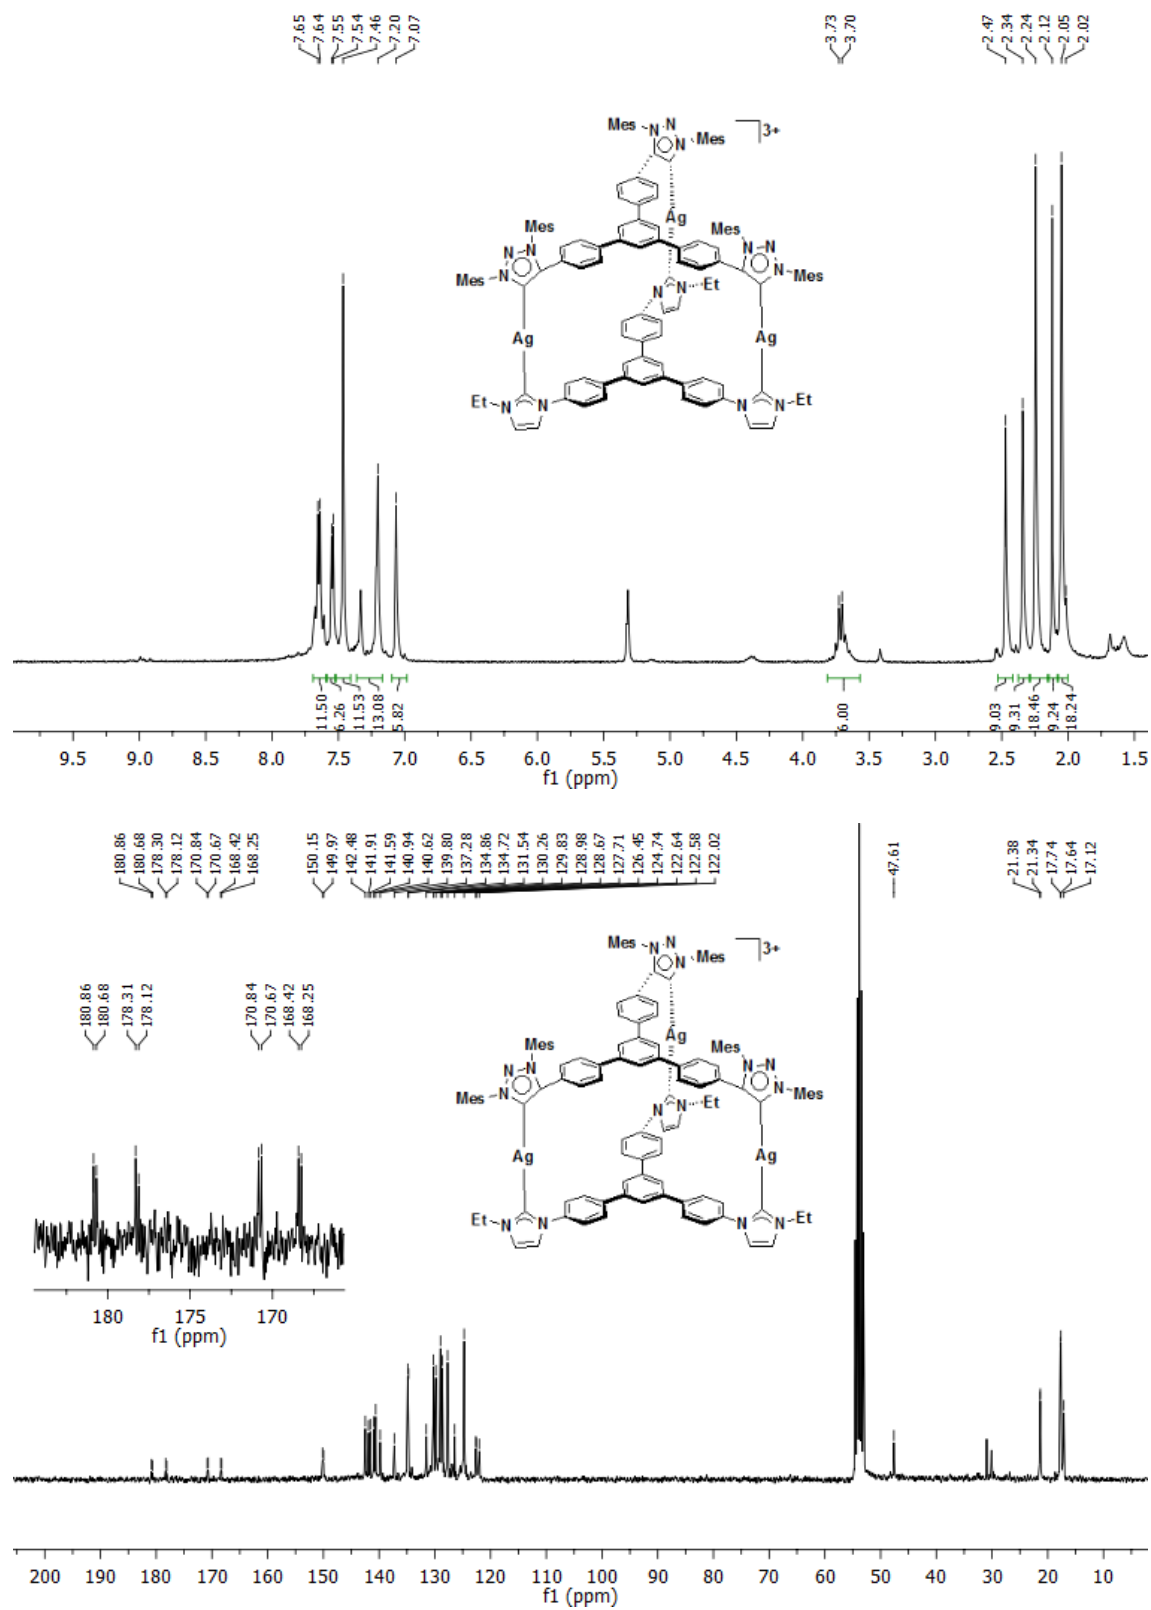



### 3. ESI Mass spectrum of **6**

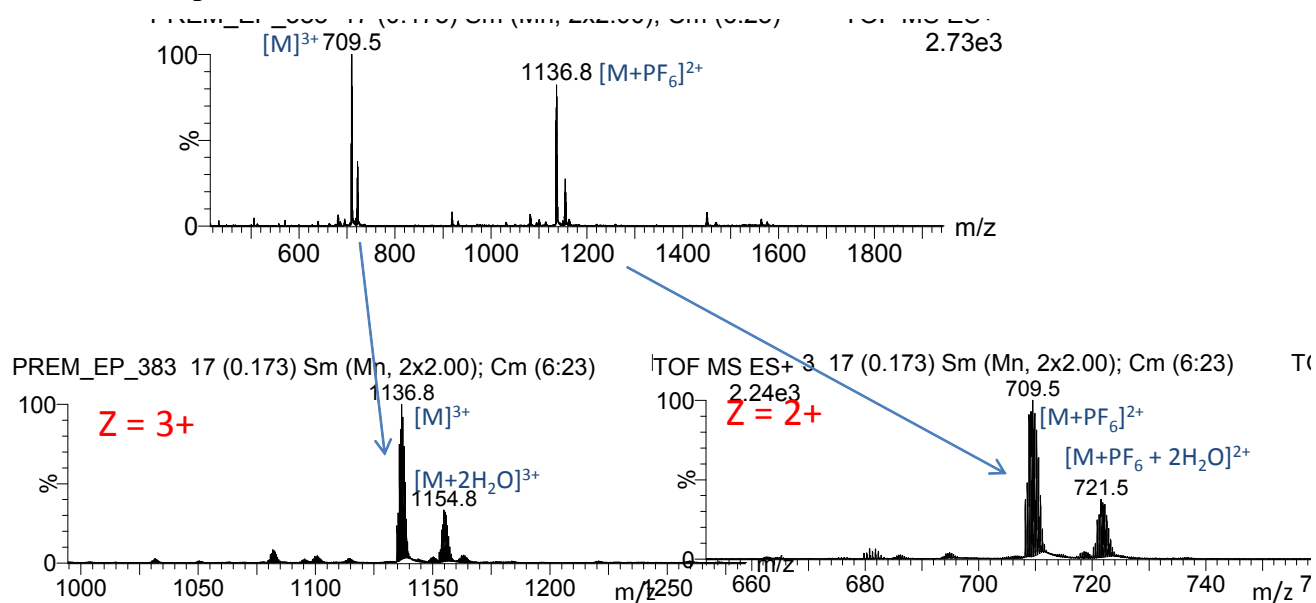

### 4 X-Ray Diffraction studies

Single crystals of **2** suitable for X-ray crystallographic analysis were obtained by slow vapour diffusion of diethylether into a DCM solution of **2**. Diffraction data were collected on a Agilent SuperNova diffractometer equipped with an Altas CCD detector using Cu  $K\alpha$  radiation ( $\lambda = 1.54184 \text{ \AA}$ ). Single crystal was mounted on a MicroMount polymer tip (MiteGen) in a random orientation. The crystals were kept during data collection at 150 K for **2**. The structures were solved by direct methods in SHELXS-97<sup>3</sup> and refined by the full-matrix method based on  $F^2$  with the program SHELXL-97 using the OLEX software package.<sup>3-4</sup> Key details of the crystal and structure refinement data for compound **2** are summarized below. Refinement ( $R = 0.0922$ ) was obtained when SQUEEZE methodology was applied only after all residual solvent peaks present in the asymmetric unit were removed. Further crystallographic data may be found in the corresponding CIF file which was deposited at the Cambridge Crystallographic Data Centre CCDC, Cambridge, UK. The reference number for **2** was assigned as *CCDC 1406599*.

**Compound 2:**  $C_{168}H_{162}Ag_3F_{18}N_{18}P_3$  ( $M = 3191.67$ ): trigonal, space group R-3 (no. 148),  $a = 35.4661(16) \text{ \AA}$ ,  $b = 35.4661(16) \text{ \AA}$ ,  $c = 26.1940(17) \text{ \AA}$ ,  $\alpha = 90^\circ \beta = 90^\circ \gamma = 120^\circ$ ,  $V = 28534(3) \text{ \AA}^3$ ,  $Z = 6$ ,  $T = 150.00(14) \text{ K}$ ,  $\mu(\text{CuK}\alpha) = 3.228 \text{ mm}^{-1}$ ,  $D_{\text{calc}} = 1.114 \text{ g/cm}^3$ , 36807 reflections measured ( $6.672^\circ \leq 2\theta \leq 129.874^\circ$ ), 10546 unique ( $R_{\text{int}} = 0.1245$ ,  $R_{\text{sigma}} = 0.0962$ ), which were used in all calculations. The final  $R_1$  was 0.0922 ( $I \geq 2\sigma(I)$ ) and  $wR_2$  was 0.2886 (all data).



#### 4. Computational details.

All calculations were carried out in Gaussian 09<sup>5</sup> (revision D.01) using the Mo6L functional,<sup>6</sup> tight optimizations, and the ultrafine integration grid (a pruned (99,590) grid). The basis sets, listed by their corresponding Gaussian 09 keyword, included QZVP<sup>7</sup> (with the QZVP ECP as implemented in Gaussian 09) for silver and TZVP<sup>8</sup> for all other atoms. The following density fitting basis sets were employed: QZVP (silver) and TZVPfit (all other atoms). The polarizable continuum model using the integral equation formalism (IEFPCM) was used for all calculations, with the radii and non-electrostatic terms of Truhlar and co-workers' SMD solvation model (scrf=smd).<sup>9</sup> The optimized geometries were verified to have no negative frequencies by frequency calculations, which also provided the enthalpies and free energies reported below. The energies were calculated at 298.15 K, under pressure (275 atm for benzene and 605 atm for methanol), following the approach of Martin and co-workers.<sup>10</sup>

#### Calculated energies for the ground-state structures (Hartree)

| Compound                             | Sovent   | E            | H            | G            |
|--------------------------------------|----------|--------------|--------------|--------------|
| NHC (carbene)                        | methanol | -535.958446  | -535.738644  | -535.782130  |
| MIC (carbene)                        | methanol | -1171.456758 | -1170.962326 | -1171.042564 |
| [Ag(NHC)] <sup>+</sup>               | methanol | -682.972172  | -682.748679  | -682.798568  |
| [Ag(MIC)] <sup>+</sup>               | methanol | -1318.473701 | -1317.975867 | -1318.062726 |
| [Ag(NHC) <sub>2</sub> ] <sup>+</sup> | methanol | -1218.998969 | -1218.553087 | -1218.630025 |
| [Ag(NHC) <sub>2</sub> ] <sup>+</sup> | benzene  | -1218.985555 | -1218.538735 | -1218.616004 |
| [Ag(MIC) <sub>2</sub> ] <sup>+</sup> | methanol | -2490.003772 | -2489.009124 | -2489.161157 |
| [Ag(MIC) <sub>2</sub> ] <sup>+</sup> | benzene  | -2489.997866 | -2489.001076 | -2489.149935 |
| [Ag(NHC)(MIC)] <sup>+</sup>          | methanol | -1854.501641 | -1853.781108 | -1853.895051 |
| [Ag(NHC)(MIC)] <sup>+</sup>          | benzene  | -1854.493038 | -1853.771150 | -1853.885411 |

## Optimized ground-state geometries

NHC

0 1

|   |             |            |             |
|---|-------------|------------|-------------|
| C | 2.69013200  | 6.24763900 | 0.35598700  |
| N | 2.39206900  | 5.40151000 | 1.39761600  |
| N | 1.56788500  | 6.16939500 | -0.40045100 |
| C | 1.13042800  | 4.83344500 | 1.27502000  |
| C | 3.26674400  | 5.16170900 | 2.49041100  |
| C | 0.61361000  | 5.31736500 | 0.12799100  |
| C | 1.39479300  | 6.88024600 | -1.66397100 |
| H | 0.73012100  | 4.13083800 | 1.98457000  |
| C | 2.74771800  | 4.88585500 | 3.75115600  |
| C | 4.64380300  | 5.20301000 | 2.29737200  |
| H | -0.33292100 | 5.13281800 | -0.35071600 |
| H | 2.18992500  | 7.62284100 | -1.71032400 |
| H | 0.44491700  | 7.41663300 | -1.62500400 |
| C | 1.44305100  | 5.95395800 | -2.85532600 |
| H | 1.67646300  | 4.87463700 | 3.90706800  |
| C | 3.60812200  | 4.64695700 | 4.81199900  |
| H | 5.03510400  | 5.40600800 | 1.30937200  |
| C | 5.49408800  | 4.97512400 | 3.36733900  |
| H | 2.39862800  | 5.43100400 | -2.90704400 |
| H | 1.31834800  | 6.52176000 | -3.77694400 |
| H | 0.64950900  | 5.20705400 | -2.81487400 |
| H | 3.19704000  | 4.43446300 | 5.79122700  |
| C | 4.98250600  | 4.69281100 | 4.62711200  |
| H | 6.56531000  | 5.00631200 | 3.21020900  |
| H | 5.65096800  | 4.50860600 | 5.45875900  |

MIC

0 1

|   |             |             |             |
|---|-------------|-------------|-------------|
| N | -4.22255500 | -0.65296000 | -0.05620300 |
| C | -3.19221900 | 0.20348700  | 0.25790200  |
| N | -3.79741500 | -1.88994300 | -0.24194500 |
| C | -5.63845700 | -0.41406500 | -0.14131000 |
| C | -2.00308300 | -0.53194400 | 0.28084100  |
| C | -3.37315800 | 1.62723500  | 0.52552700  |
| N | -2.47754400 | -1.77177800 | -0.03768800 |
| C | -6.23630700 | -0.39245800 | -1.40317400 |
| C | -6.34626100 | -0.20476600 | 1.04058500  |
| C | -2.54769800 | 2.23295600  | 1.47962200  |
| C | -4.31611800 | 2.41619000  | -0.14077700 |
| C | -1.69460900 | -2.97162100 | -0.15868700 |
| C | -7.60089600 | -0.14070000 | -1.45619600 |
| C | -5.43577000 | -0.61688700 | -2.64357500 |
| C | -7.71163300 | 0.04362400  | 0.92894300  |
| C | -5.67164600 | -0.23814200 | 2.37213900  |
| C | -2.67102800 | 3.58118100  | 1.76823000  |
| H | -1.81364000 | 1.62772000  | 1.99791600  |
| C | -4.43916400 | 3.76479300  | 0.15628900  |
| H | -4.94152300 | 1.98401400  | -0.91124700 |
| C | -0.99856800 | -3.19807700 | -1.34448800 |
| C | -1.64983800 | -3.84868900 | 0.92490300  |
| C | -8.35455200 | 0.08063300  | -0.30395500 |
| H | -8.08749300 | -0.11093900 | -2.42548400 |
| H | -4.50328500 | -0.04849100 | -2.63393300 |

|   |              |              |             |
|---|--------------|--------------|-------------|
| H | -5.16128600  | -1.66806400  | -2.75598900 |
| H | -6.00054100  | -0.32808500  | -3.52791900 |
| H | -8.28555100  | 0.20716900   | 1.83475200  |
| H | -4.98406400  | -1.08146000  | 2.45985800  |
| H | -5.08424800  | 0.66784700   | 2.54499500  |
| H | -6.40213800  | -0.31006200  | 3.17551100  |
| C | -3.62234100  | 4.35181900   | 1.11247700  |
| H | -2.02654600  | 4.03109300   | 2.51365200  |
| H | -5.17224000  | 4.36204400   | -0.37213900 |
| C | -0.23299800  | -4.35765900  | -1.42658200 |
| C | -1.07157500  | -2.23177500  | -2.48053000 |
| C | -0.86779800  | -4.99074900  | 0.79306000  |
| C | -2.41940200  | -3.57251700  | 2.17485200  |
| C | -9.82401100  | 0.33352500   | -0.39948300 |
| H | -3.72220200  | 5.40575600   | 1.34137300  |
| C | -0.15523400  | -5.26337800  | -0.37263200 |
| H | 0.31681400   | -4.55497800  | -2.34089600 |
| H | -0.56422000  | -1.29461200  | -2.23993000 |
| H | -0.60440900  | -2.64318500  | -3.37327100 |
| H | -2.10367700  | -1.97252300  | -2.72558200 |
| H | -0.81361800  | -5.68406800  | 1.62596200  |
| H | -2.11661700  | -4.24405600  | 2.97598800  |
| H | -2.27793600  | -2.54580400  | 2.51842300  |
| H | -3.49220100  | -3.70764900  | 2.01930900  |
| H | -10.04800900 | 1.11419500   | -1.12790200 |
| H |              | -10.35613500 | -0.56136200 |
|   | 0.72981900   |              |             |
| H | -10.24501600 | 0.63303100   | 0.55892200  |
| C | 0.64762200   | -6.51777000  | -0.49652200 |
| H | 1.16087000   | -6.76114600  | 0.43402200  |
| H | 0.00595600   | -7.37040100  | -0.73289000 |
| H | 1.39158500   | -6.44515700  | -1.28884500 |

[Ag(NHC)]<sup>+</sup>

1 1

|    |             |             |             |
|----|-------------|-------------|-------------|
| Ag | -0.04729800 | -0.09812600 | 0.23297600  |
| C  | 2.00720400  | 0.38448300  | 0.28440400  |
| N  | 2.59995900  | 1.60755900  | 0.20266700  |
| N  | 3.03482900  | -0.47522700 | 0.43513300  |
| C  | 3.97643300  | 1.49835700  | 0.30963400  |
| C  | 1.90353400  | 2.84200000  | 0.05443000  |
| C  | 4.24698100  | 0.18338400  | 0.44578100  |
| C  | 2.88925800  | -1.92980000 | 0.49855000  |
| H  | 4.62459600  | 2.35475800  | 0.25702600  |
| C  | 2.30539300  | 3.94533600  | 0.79640700  |
| C  | 0.83964700  | 2.93409200  | -0.83479500 |
| H  | 5.18187400  | -0.33916600 | 0.54771200  |
| H  | 1.87146900  | -2.12468800 | 0.83839900  |
| H  | 3.57266300  | -2.29575700 | 1.26454100  |
| C  | 3.15566000  | -2.58051600 | -0.83683700 |
| H  | 3.12992000  | 3.85739500  | 1.49280000  |
| C  | 1.63039700  | 5.14700100  | 0.64806400  |
| H  | 0.56328400  | 2.07616900  | -1.43555300 |
| C  | 0.16399800  | 4.13780400  | -0.96426900 |
| H  | 2.45454800  | -2.22305800 | -1.59179200 |
| H  | 3.04267900  | -3.66068000 | -0.75348400 |
| H  | 4.16808200  | -2.37447700 | -1.18454100 |

## Supporting Information

|                        |             |             |             |                                              |              |             |             |
|------------------------|-------------|-------------|-------------|----------------------------------------------|--------------|-------------|-------------|
| H                      | 1.94104200  | 6.00688600  | 1.22811700  | C                                            | 0.72869100   | -6.45795700 | -0.30890800 |
| C                      | 0.55671600  | 5.24543400  | -0.22599200 | H                                            | -10.05510700 | 1.10014500  | -1.04622800 |
| H                      | -0.66240400 | 4.21198500  | -1.65996800 | H                                            | -10.35180200 | -0.57125100 | -           |
| H                      | 0.03074300  | 6.18538300  | -0.33617400 | 0.62375000                                   |              |             |             |
| [Ag(MIC)] <sup>+</sup> |             |             |             | H                                            | -10.21834200 | 0.63932000  | 0.64947900  |
| 1 1                    |             |             |             | H                                            | 1.49233700   | -6.46019900 | 0.47112300  |
| C                      | -3.18195000 | 0.26815300  | 0.12936400  | H                                            | 0.12310400   | -7.35261600 | -0.15266600 |
| C                      | -2.00937900 | -0.47761800 | 0.14846100  | H                                            | 1.23107300   | -6.55765100 | -1.26962000 |
| N                      | -4.20679000 | -0.62031200 | -0.07193200 | [Ag(NHC) <sub>2</sub> ] <sup>+</sup> in MeOH |              |             |             |
| C                      | -3.35274600 | 1.70672400  | 0.29415900  | 1 1                                          |              |             |             |
| Ag                     | 0.00952100  | 0.06015400  | 0.35830900  | Ag                                           | 4.27695400   | 7.45945300  | 0.00697300  |
| N                      | -2.46163600 | -1.74761600 | -0.04937100 | C                                            | 2.52030100   | 6.40992000  | 0.51904700  |
| N                      | -3.77932200 | -1.86673500 | -0.18339400 | C                                            | 6.06349500   | 8.47578300  | -0.46674500 |
| C                      | -5.62666900 | -0.38766900 | -0.12910700 | N                                            | 2.34108500   | 5.53740200  | 1.54940600  |
| C                      | -2.52356800 | 2.38044100  | 1.19689000  | N                                            | 1.31539200   | 6.45525000  | -0.08614200 |
| C                      | -4.30198700 | 2.43525500  | -0.42770500 | N                                            | 7.12704700   | 8.73856200  | 0.34186000  |
| C                      | -1.66223800 | -2.94141900 | -0.12081500 | N                                            | 6.42557600   | 8.98521000  | -1.66223800 |
| C                      | -6.25764400 | -0.45572200 | -1.37270300 | C                                            | 1.04127700   | 5.06232100  | 1.58239600  |
| C                      | -6.29731400 | -0.10499900 | 1.05851000  | C                                            | 3.35162400   | 5.19616800  | 2.49450400  |
| C                      | -2.64783200 | 3.74735300  | 1.37800000  | C                                            | 0.39937800   | 5.63979800  | 0.54376500  |
| H                      | -1.79021200 | 1.81758700  | 1.76414800  | C                                            | 1.02974200   | 7.29157000  | -1.25606500 |
| C                      | -4.42317900 | 3.80269400  | -0.23855800 | C                                            | 8.13233700   | 9.39196200  | -0.35089000 |
| H                      | -4.93234200 | 1.93874200  | -1.15402500 | C                                            | 7.20643000   | 8.35618200  | 1.71255900  |
| C                      | -0.96463500 | -3.20099500 | -1.29818000 | C                                            | 7.68141900   | 9.55169400  | -1.61420800 |
| C                      | -1.61469000 | -3.77356300 | 0.99813200  | C                                            | 5.56696800   | 8.93515200  | -2.84940200 |
| C                      | -7.62439800 | -0.21399600 | -1.40141900 | H                                            | 0.70824200   | 4.35064500  | 2.31639100  |
| C                      | -5.48968200 | -0.76281300 | -2.61595700 | C                                            | 3.03157700   | 5.13205300  | 3.84434500  |
| C                      | -7.66672300 | 0.12860400  | 0.96998700  | C                                            | 4.64553200   | 4.93131300  | 2.05897100  |
| C                      | -5.58177800 | -0.05013300 | 2.36773800  | H                                            | -0.61456100  | 5.54280800  | 0.19747400  |
| C                      | -3.60107000 | 4.46189800  | 0.66454000  | H                                            | 1.30860000   | 8.31581400  | -1.00307000 |
| H                      | -2.00367100 | 4.25522400  | 2.08506600  | H                                            | -0.04907500  | 7.27387000  | -1.39925200 |
| H                      | -5.15932100 | 4.35649800  | -0.80789600 | C                                            | 1.75685500   | 6.82471500  | -2.49318000 |
| C                      | -0.18867100 | -4.35631900 | -1.33449900 | H                                            | 9.04885000   | 9.69848300  | 0.12084900  |
| C                      | -1.04338600 | -2.27557100 | -2.46695400 | C                                            | 6.11056800   | 8.54260900  | 2.54840000  |
| C                      | -0.82387300 | -4.91194400 | 0.90783800  | C                                            | 8.38377000   | 7.80487700  | 2.20078400  |
| C                      | -2.38254700 | -3.45054600 | 2.23746500  | H                                            | 8.13463600   | 10.01592600 | -2.47239300 |
| C                      | -8.34440100 | 0.08140700  | -0.24388700 | H                                            | 6.18798500   | 9.20335900  | -3.70225000 |
| H                      | -8.13983700 | -0.25324900 | -2.35511500 | H                                            | 5.25570500   | 7.89767700  | -2.98314900 |
| H                      | -4.57387200 | -0.17117100 | -2.68433900 | C                                            | 4.36948100   | 9.84529100  | -2.72815600 |
| H                      | -5.18847400 | -1.81207200 | -2.64945800 | H                                            | 2.02279200   | 5.35155900  | 4.17125000  |
| H                      | -6.08925500 | -0.56281700 | -3.50157600 | C                                            | 4.01809300   | 4.80641300  | 4.76331500  |
| H                      | -8.21616900 | 0.34811600  | 1.87895400  | H                                            | 4.87210600   | 4.95112600  | 0.99961300  |
| H                      | -4.90583100 | -0.89763200 | 2.49797600  | C                                            | 5.62590700   | 4.61921600  | 2.98813600  |
| H                      | -4.97517200 | 0.85559700  | 2.45351900  | H                                            | 2.83903900   | 6.85554800  | -2.34597900 |
| H                      | -6.28784600 | -0.04937200 | 3.19540300  | H                                            | 1.51411400   | 7.47576200  | -3.33257600 |
| H                      | -3.70047200 | 5.53044700  | 0.81019000  | H                                            | 1.47755700   | 5.80540600  | -2.76079600 |
| C                      | -0.10627400 | -5.22041200 | -0.24720100 | H                                            | 5.21117800   | 9.00713700  | 2.16298600  |
| H                      | 0.36026800  | -4.58594300 | -2.24144300 | C                                            | 6.19454200   | 8.15627600  | 3.87705800  |
| H                      | -0.51516100 | -1.33924000 | -2.26428400 | H                                            | 9.22592800   | 7.65630600  | 1.53637800  |
| H                      | -0.59601300 | -2.72479600 | -3.35124100 | C                                            | 8.46011100   | 7.43383400  | 3.53503700  |
| H                      | -2.07510500 | -2.00749700 | -2.70447000 | H                                            | 4.67021000   | 10.88653500 | -2.61009400 |
| H                      | -0.76730300 | -5.57521500 | 1.76451200  | H                                            | 3.75299800   | 9.76818100  | -3.62323900 |
| H                      | -2.08991300 | -4.10334300 | 3.05729400  | H                                            | 3.75468600   | 9.56671900  | -1.86909300 |
| H                      | -2.22377000 | -2.41707300 | 2.55327300  | H                                            | 3.77033400   | 4.76144000  | 5.81647700  |
| H                      | -3.45704500 | -3.57207600 | 2.08458000  | C                                            | 5.31565900   | 4.55503200  | 4.33999300  |
| C                      | -9.81601400 | 0.32815400  | -0.31312700 | H                                            | 6.63472300   | 4.41579800  | 2.65030900  |

## Supporting Information

|                                                 |             |             |             |                                                  |            |             |             |
|-------------------------------------------------|-------------|-------------|-------------|--------------------------------------------------|------------|-------------|-------------|
| H                                               | 5.34127900  | 8.30031200  | 4.52845800  | H                                                | 5.99107400 | 4.25699600  | 5.12138300  |
| C                                               | 7.36739000  | 7.60351200  | 4.37369900  | H                                                | 7.54756800 | 7.32609400  | 5.39920700  |
| H                                               | 9.37666300  | 7.00073800  | 3.91560400  |                                                  |            |             |             |
| H                                               | 6.08494800  | 4.30999300  | 5.06175100  |                                                  |            |             |             |
| H                                               | 7.42875900  | 7.30570700  | 5.41306600  |                                                  |            |             |             |
| [Ag(NHC) <sub>2</sub> ] <sup>+</sup> in benzene |             |             |             | [Ag(MIC) <sub>2</sub> ] <sup>+</sup> in methanol |            |             |             |
| 1 1                                             |             |             |             | 1 1                                              |            |             |             |
| Ag                                              | 4.28924100  | 7.44942600  | 0.02348600  | N                                                | 4.21285400 | 0.72074800  | -0.67129800 |
| C                                               | 2.51733000  | 6.41026600  | 0.52157200  | N                                                | 2.92963900 | 0.56121700  | -0.99084800 |
| C                                               | 6.07233700  | 8.47293100  | -0.46815300 | N                                                | 4.19731900 | 0.69348200  | 0.65090300  |
| N                                               | 2.32496400  | 5.53713200  | 1.54697600  | C                                                | 2.93336600 | 0.52643900  | 1.15317700  |
| N                                               | 1.32109800  | 6.45518100  | -0.10210200 | C                                                | 2.07581700 | 0.43180800  | 0.06350100  |
| N                                               | 7.13587500  | 8.75026500  | 0.33301700  | C                                                | 2.57043900 | 0.62715300  | -2.38275400 |
| N                                               | 6.41288000  | 8.99996500  | -1.66329800 | C                                                | 2.22581400 | -0.54597700 | -3.05100000 |
| C                                               | 1.02722000  | 5.05869000  | 1.55813400  | C                                                | 1.91293000 | -0.43794900 | -4.40430000 |
| C                                               | 3.31956300  | 5.19026400  | 2.50999700  | C                                                | 1.93933600 | 0.78334100  | -5.07059800 |
| C                                               | 0.39774400  | 5.63808200  | 0.51309700  | C                                                | 2.25621500 | 1.93153200  | -4.34657600 |
| C                                               | 1.04871200  | 7.29194800  | -1.27396500 | C                                                | 2.57916300 | 1.88156600  | -2.99696500 |
| C                                               | 8.12009900  | 9.42939300  | -0.36287100 | C                                                | 5.44468300 | 0.84658700  | 1.35337300  |
| C                                               | 7.24064300  | 8.36260500  | 1.70281000  | C                                                | 6.31838000 | -0.24142900 | 1.38587500  |
| C                                               | 7.65748700  | 9.58954000  | -1.62173400 | C                                                | 7.50054000 | -0.08357600 | 2.09778500  |
| C                                               | 5.54817100  | 8.93701600  | -2.84429900 | C                                                | 7.80953200 | 1.10538800  | 2.75640400  |
| H                                               | 0.68662600  | 4.34318100  | 2.28416300  | C                                                | 6.90515500 | 2.16077300  | 2.68743100  |
| C                                               | 2.97287600  | 5.12077300  | 3.85282500  | C                                                | 5.70664500 | 2.05957800  | 1.98753300  |
| C                                               | 4.61900100  | 4.91912100  | 2.09820600  | H                                                | 1.65877500 | -1.33933500 | -4.95241000 |
| H                                               | -0.61129300 | 5.54048500  | 0.15428600  | H                                                | 2.26368700 | 2.89337800  | -4.84850600 |
| H                                               | 1.33503500  | 8.31458100  | -1.02241600 | H                                                | 8.19302300 | -0.91702500 | 2.14730900  |
| H                                               | -0.02977000 | 7.28681800  | -1.42156300 | H                                                | 7.13360500 | 3.09289700  | 3.19281700  |
| C                                               | 1.77350900  | 6.81318900  | -2.50860300 | C                                                | 2.59902100 | 0.52573200  | 2.57333300  |
| H                                               | 9.03203700  | 9.75390200  | 0.10454000  | C                                                | 1.45233200 | 1.21613400  | 2.98233600  |
| C                                               | 6.15810000  | 8.53332900  | 2.55767900  | C                                                | 3.38011400 | -0.12081200 | 3.53403800  |
| C                                               | 8.43475200  | 7.83015200  | 2.17053800  | C                                                | 1.10917400 | 1.27581100  | 4.32205000  |
| H                                               | 8.09601900  | 10.06813200 | -2.47911200 | H                                                | 0.84503200 | 1.72088800  | 2.23863200  |
| H                                               | 6.16083800  | 9.19922300  | -3.70513600 | C                                                | 3.02778800 | -0.06038100 | 4.87380600  |
| H                                               | 5.24293900  | 7.89636700  | -2.96866300 | H                                                | 4.25369100 | -0.68537700 | 3.23295000  |
| C                                               | 4.34819200  | 9.84487000  | -2.72249800 | C                                                | 1.89847700 | 0.64169100  | 5.27251500  |
| H                                               | 1.96094800  | 5.35005500  | 4.16244900  | H                                                | 0.22247100 | 1.82005300  | 4.62396400  |
| C                                               | 3.93712900  | 4.77812800  | 4.78790000  | H                                                | 3.63787300 | -0.57002800 | 5.60931800  |
| H                                               | 4.86694600  | 4.94107700  | 1.04395000  | H                                                | 1.62902100 | 0.68747300  | 6.32081300  |
| C                                               | 5.57788000  | 4.59344400  | 3.04395200  | C                                                | 2.18681300 | -1.86308400 | -2.35008800 |
| H                                               | 2.85544900  | 6.84424200  | -2.36166800 | H                                                | 1.32648300 | -1.92097500 | -1.67421600 |
| H                                               | 1.53030600  | 7.45239200  | -3.35639600 | H                                                | 2.10465800 | -2.68172800 | -3.06265100 |
| H                                               | 1.49735000  | 5.79068900  | -2.76471300 | H                                                | 3.07598700 | -2.02867700 | -1.73855000 |
| H                                               | 5.24613800  | 8.98703300  | 2.19026100  | C                                                | 1.63949500 | 0.87811000  | -6.53117200 |
| C                                               | 6.27182600  | 8.14937300  | 3.88422900  | H                                                | 0.76388400 | 1.50295000  | -6.71835300 |
| H                                               | 9.26675600  | 7.69176800  | 1.49167000  | H                                                | 2.46812300 | 1.33970600  | -7.07158600 |
| C                                               | 8.54152400  | 7.46376400  | 3.50319500  | H                                                | 1.45673300 | -0.09984600 | -6.97261000 |
| H                                               | 4.64422900  | 10.88703300 | -2.60653400 | C                                                | 2.92477300 | 3.11791800  | -2.23377900 |
| H                                               | 3.72640300  | 9.76607000  | -3.61323300 | H                                                | 2.67029400 | 4.00889000  | -2.80442900 |
| H                                               | 3.74047400  | 9.56792700  | -1.85813400 | H                                                | 2.39498100 | 3.16277700  | -1.27952800 |
| H                                               | 3.66816000  | 4.72459100  | 5.83500100  | H                                                | 3.99206000 | 3.16342300  | -2.00749900 |
| C                                               | 5.23968700  | 4.51869400  | 4.38747200  | C                                                | 4.74221700 | 3.19770200  | 1.93266100  |
| H                                               | 6.59165800  | 4.38585600  | 2.72570800  | H                                                | 4.35455300 | 3.35607600  | 0.92483300  |
| H                                               | 5.42864100  | 8.27966000  | 4.55062000  | H                                                | 3.87875800 | 3.02007800  | 2.57993000  |
| C                                               | 7.46180200  | 7.61801300  | 4.36040100  | H                                                | 5.21345200 | 4.12078600  | 2.26397100  |
| H                                               | 9.47203300  | 7.04869100  | 3.86830500  | C                                                | 5.98433000 | -1.52492000 | 0.70038900  |
|                                                 |             |             |             | H                                                | 4.96775000 | -1.85328500 | 0.92865000  |
|                                                 |             |             |             | H                                                | 6.04418400 | -1.42675000 | -0.38569900 |
|                                                 |             |             |             | H                                                | 6.67030900 | -2.31480200 | 0.99897600  |

## Supporting Information

|    |             |             |             |                                                 |             |             |             |
|----|-------------|-------------|-------------|-------------------------------------------------|-------------|-------------|-------------|
| C  | 9.09757300  | 1.24896400  | 3.49898200  | C                                               | -9.08306800 | -1.22840300 | 3.41212900  |
| H  | 9.37007300  | 0.32725000  | 4.01308000  | H                                               | -9.35467100 | -0.30548100 | 3.92449100  |
| H  | 9.91791300  | 1.48146800  | 2.81541600  | H                                               | -9.89929600 | -1.45657800 | 2.72222000  |
| H  | 9.05251900  | 2.05204400  | 4.23324700  | H                                               | -9.04798400 | -2.03199100 | 4.14638600  |
| Ag | 0.02573000  | -0.01001600 | -0.01393900 |                                                 |             |             |             |
| C  | -2.02639900 | -0.44693100 | 0.04183300  | [Ag(MIC) <sub>2</sub> ] <sup>+</sup> in benzene |             |             |             |
| N  | -2.87162300 | -0.55803100 | -1.02158600 | 1 1                                             |             |             |             |
| C  | -2.89457900 | -0.54602700 | 1.12268700  | N                                               | 4.23979300  | 0.67762600  | -0.65078800 |
| N  | -4.15898400 | -0.71070900 | -0.71528000 | N                                               | 2.96616500  | 0.50769200  | -0.99931400 |
| C  | -2.49891800 | -0.61290000 | -2.41050700 | N                                               | 4.19142900  | 0.69611500  | 0.67063700  |
| N  | -4.15517500 | -0.69760100 | 0.60721600  | C                                               | 2.91304700  | 0.54288200  | 1.14650500  |
| C  | -2.57299500 | -0.56177400 | 2.54575400  | C                                               | 2.08421000  | 0.41381000  | 0.03758500  |
| C  | -2.13780900 | 0.56383400  | -3.06363300 | C                                               | 2.65425100  | 0.51118400  | -2.40548700 |
| C  | -2.50968000 | -1.86142900 | -3.03668900 | C                                               | 2.33768300  | -0.69207200 | -3.03202300 |
| C  | -5.41018600 | -0.84499000 | 1.29716500  | C                                               | 2.07998100  | -0.64759500 | -4.39938100 |
| C  | -1.43437900 | -1.26370500 | 2.95774000  | C                                               | 2.12797900  | 0.54043300  | -5.12003300 |
| C  | -3.35794000 | 0.08059900  | 3.50616600  | C                                               | 2.41890800  | 1.72077200  | -4.43909700 |
| C  | -1.80855900 | 0.46585700  | -4.41383300 | C                                               | 2.69073200  | 1.73459800  | -3.07807600 |
| C  | -2.09842100 | 1.87451300  | -2.35076500 | C                                               | 5.42536100  | 0.86983800  | 1.39452700  |
| C  | -2.17075800 | -1.90128800 | -4.38271600 | C                                               | 6.31534500  | -0.20469600 | 1.44586700  |
| C  | -2.87305100 | -3.10225000 | -2.28922200 | C                                               | 7.48439500  | -0.02521600 | 2.17303100  |
| C  | -6.27467100 | 0.25046200  | 1.32951300  | C                                               | 7.76752200  | 1.17042700  | 2.83029600  |
| C  | -5.68758500 | -2.05930700 | 1.92211900  | C                                               | 6.84980800  | 2.21150000  | 2.73954800  |
| C  | -1.10278200 | -1.33835400 | 4.29961700  | C                                               | 5.66354500  | 2.09018600  | 2.02400100  |
| H  | -0.82407400 | -1.76515200 | 2.21427000  | H                                               | 1.84583300  | -1.57342000 | -4.91428100 |
| C  | -3.01746700 | 0.00469600  | 4.84821500  | H                                               | 2.44533700  | 2.65801400  | -4.98490500 |
| H  | -4.22515300 | 0.65397500  | 3.20344300  | H                                               | 8.19008900  | -0.84656300 | 2.23226500  |
| C  | -1.83557000 | -0.74903000 | -5.09173200 | H                                               | 7.05900100  | 3.15065200  | 3.23963400  |
| H  | -1.54029700 | 1.37017100  | -4.95034300 | C                                               | 2.54609700  | 0.58103300  | 2.55909600  |
| H  | -1.24766400 | 1.91988100  | -1.66191300 | C                                               | 1.38260600  | 1.26692600  | 2.92597400  |
| H  | -1.99922500 | 2.69857500  | -3.05487900 | C                                               | 3.31610100  | -0.02322100 | 3.55581500  |
| H  | -2.99506000 | 2.04218600  | -1.75084700 | C                                               | 1.01283800  | 1.36416600  | 4.25583900  |
| H  | -2.17939800 | -2.85821400 | -4.89394700 | H                                               | 0.78165200  | 1.73767900  | 2.15541200  |
| H  | -2.62180100 | -3.98973500 | -2.86664200 | C                                               | 2.94024100  | 0.07770400  | 4.88595000  |
| H  | -2.35140700 | -3.16131300 | -1.33124500 | H                                               | 4.20576800  | -0.58079800 | 3.29170300  |
| H  | -3.94247000 | -3.14024100 | -2.07195500 | C                                               | 1.79518600  | 0.77670100  | 5.24039300  |
| C  | -7.46395900 | 0.09849700  | 2.03079000  | H                                               | 0.11191900  | 1.90213300  | 4.52339700  |
| C  | -5.92314900 | 1.53587300  | 0.65658600  | H                                               | 3.54567200  | -0.39536800 | 5.64863700  |
| C  | -6.89248200 | -2.15426200 | 2.61183800  | H                                               | 1.50831700  | 0.85675000  | 6.28158200  |
| C  | -4.73206900 | -3.20504000 | 1.86961000  | C                                               | 2.27100000  | -1.97711800 | -2.27472400 |
| C  | -1.89612500 | -0.70854300 | 5.24956400  | H                                               | 1.37982200  | -2.01357200 | -1.63916700 |
| H  | -0.22177300 | -1.89064300 | 4.60359900  | H                                               | 2.22812600  | -2.82799600 | -2.95150900 |
| H  | -3.63048700 | 0.51114700  | 5.58349600  | H                                               | 3.13070500  | -2.11241600 | -1.61617400 |
| C  | -1.51521600 | -0.83300700 | -6.54857300 | C                                               | 1.89054700  | 0.56339000  | -6.59482200 |
| C  | -7.78837400 | -1.09158300 | 2.67986400  | H                                               | 1.12112000  | 1.28795900  | -6.86536600 |
| H  | -8.14959100 | 0.93760300  | 2.08007700  | H                                               | 2.79426700  | 0.85773000  | -7.13219200 |
| H  | -4.90719200 | 1.85552200  | 0.89970700  | H                                               | 1.58768700  | -0.41064200 | -6.97383800 |
| H  | -5.96999200 | 1.44548600  | -0.43078600 | C                                               | 3.01388600  | 3.00582500  | -2.36308700 |
| H  | -6.60713900 | 2.32866300  | 0.95201100  | H                                               | 2.79353700  | 3.86991000  | -2.98617700 |
| H  | -7.13280100 | -3.08720800 | 3.11015100  | H                                               | 2.44221000  | 3.10474500  | -1.43749400 |
| H  | -4.33554400 | -3.36058000 | 0.86484500  | H                                               | 4.07038200  | 3.05477700  | -2.09236500 |
| H  | -3.87384600 | -3.03835700 | 2.52665400  | C                                               | 4.69276100  | 3.22139400  | 1.94022100  |
| H  | -5.21412400 | -4.12618700 | 2.19057100  | H                                               | 4.33266200  | 3.37449000  | 0.92149700  |
| H  | -1.63572400 | -0.76602300 | 6.29957800  | H                                               | 3.81431600  | 3.04319000  | 2.56606800  |
| H  | -0.63559400 | -1.45475400 | -6.72732900 | H                                               | 5.14896700  | 4.14977400  | 2.27712200  |
| H  | -2.33496700 | -1.29267400 | -7.10384600 | C                                               | 6.01840300  | -1.49579500 | 0.75555300  |
| H  | -1.32769800 | 0.14832500  | -6.98034400 | H                                               | 5.02678500  | -1.87714100 | 1.01187900  |

## Supporting Information

|    |             |             |             |                                         |             |             |             |
|----|-------------|-------------|-------------|-----------------------------------------|-------------|-------------|-------------|
| H  | 6.04026700  | -1.38287800 | -0.32989000 | H                                       | -2.66023400 | -0.81746400 | -7.15816500 |
| H  | 6.74651300  | -2.25754800 | 1.02486900  | H                                       | -1.46091700 | 0.45529400  | -6.98032800 |
| C  | 9.04440400  | 1.33945500  | 3.58652400  | C                                       | -9.03767900 | -1.28987800 | 3.49360100  |
| H  | 9.32583100  | 0.42796300  | 4.11322100  | H                                       | -9.31532300 | -0.37514800 | 4.01663400  |
| H  | 9.86886100  | 1.57960100  | 2.91120000  | H                                       | -9.85839700 | -1.52364100 | 2.81153700  |
| H  | 8.97969000  | 2.14671400  | 4.31434300  | H                                       | -8.98689600 | -2.09667700 | 4.22306000  |
| Ag | 0.02678000  | -0.00812200 | -0.05437400 | [Ag(NHC)(MIC)] <sup>+</sup> in methanol |             |             |             |
| C  | -2.03296700 | -0.42403900 | 0.02084100  | 1 1                                     |             |             |             |
| N  | -2.90521800 | -0.49174000 | -1.02622100 | Ag                                      | -0.02006500 | -0.05429000 | 0.22522900  |
| C  | -2.87449300 | -0.56210700 | 1.11943200  | C                                       | -2.06089900 | -0.53527800 | 0.10371100  |
| N  | -4.18415700 | -0.65265400 | -0.69350300 | C                                       | 2.03589600  | 0.39702100  | 0.29221200  |
| C  | -2.57779000 | -0.48722200 | -2.42891700 | N                                       | -2.53162500 | -1.79761000 | -0.10027200 |
| N  | -4.14964000 | -0.69226700 | 0.62780200  | C                                       | -3.22541300 | 0.22238000  | 0.09446500  |
| C  | -2.52112500 | -0.63582800 | 2.53418100  | N                                       | 2.63793500  | 1.61646200  | 0.21154200  |
| C  | -2.24719300 | 0.71752500  | -3.04485100 | N                                       | 3.06057400  | -0.46736000 | 0.44423600  |
| C  | -2.61284300 | -1.70694400 | -3.10839900 | N                                       | -3.85154300 | -1.90383800 | -0.22841600 |
| C  | -5.39348200 | -0.85579000 | 1.33618500  | C                                       | -1.71717000 | -2.98295000 | -0.15490800 |
| C  | -1.36257000 | -1.33497300 | 2.89224500  | N                                       | -4.26331500 | -0.65055300 | -0.10818600 |
| C  | -3.29877500 | -0.05841600 | 3.54108300  | C                                       | -3.35717600 | 1.66359100  | 0.27401600  |
| C  | -1.97388700 | 0.67901600  | -4.40941600 | C                                       | 4.01323700  | 1.50205100  | 0.32215700  |
| C  | -2.18077100 | 1.99759500  | -2.27925600 | C                                       | 1.93149600  | 2.84403300  | 0.05441900  |
| C  | -2.32434100 | -1.68740900 | -4.46583300 | C                                       | 4.27655600  | 0.18439900  | 0.45776900  |
| C  | -2.95090400 | -2.97993000 | -2.40346300 | C                                       | 2.89575000  | -1.92092500 | 0.50203100  |
| C  | -6.26994400 | 0.23004900  | 1.38530400  | C                                       | -0.96266800 | -3.21744000 | -1.30300400 |
| C  | -5.65327500 | -2.07646500 | 1.95639800  | C                                       | -1.66269300 | -3.80154400 | 0.97455900  |
| C  | -1.00410500 | -1.46994900 | 4.22186300  | C                                       | -5.67991700 | -0.39384100 | -0.14675600 |
| H  | -0.75626900 | -1.78594100 | 2.11412500  | C                                       | -2.48711300 | 2.30177800  | 1.16583100  |
| C  | -2.93447600 | -0.19788700 | 4.87099000  | C                                       | -4.29265100 | 2.43142800  | -0.42451000 |
| H  | -4.18624000 | 0.50713000  | 3.28704100  | H                                       | 4.66661300  | 2.35487700  | 0.27363900  |
| C  | -2.01970500 | -0.50488700 | -5.13693700 | C                                       | 2.29796600  | 3.95120600  | 0.80843700  |
| H  | -1.72845400 | 1.60626900  | -4.91642000 | C                                       | 0.87994800  | 2.92050300  | -0.85266100 |
| H  | -1.30141800 | 2.02071400  | -1.62670000 | H                                       | 5.20918900  | -0.34207600 | 0.56115400  |
| H  | -2.11553900 | 2.85167900  | -2.95015000 | H                                       | 1.88896500  | -2.10520300 | 0.88275400  |
| H  | -3.05129400 | 2.13886000  | -1.63638700 | H                                       | 3.60486700  | -2.30418400 | 1.23547900  |
| H  | -2.34928600 | -2.62151600 | -5.01705900 | C                                       | 3.09443300  | -2.56692600 | -0.84837600 |
| H  | -2.73057600 | -3.84219900 | -3.02906000 | C                                       | -0.12473000 | -4.32919000 | -1.29723000 |
| H  | -2.38821300 | -3.08749600 | -1.47328000 | C                                       | -1.02331800 | -2.30349300 | -2.48147500 |
| H  | -4.01016600 | -3.02322300 | -2.14266800 | C                                       | -0.80580700 | -4.89428600 | 0.92736100  |
| C  | -7.44812000 | 0.06149200  | 2.10032800  | C                                       | -2.47457200 | -3.50027600 | 2.19113200  |
| C  | -5.94931200 | 1.52229600  | 0.70804700  | C                                       | -6.32765900 | -0.42288500 | -1.38314100 |
| C  | -6.84742200 | -2.18607500 | 2.66077000  | C                                       | -6.33212500 | -0.11988900 | 1.05361500  |
| C  | -4.69584200 | -3.21946600 | 1.87778300  | C                                       | -2.55795700 | 3.67057900  | 1.35926600  |
| C  | -1.79377500 | -0.90870900 | 5.21579200  | H                                       | -1.76091600 | 1.70972400  | 1.71236900  |
| H  | -0.10667800 | -2.01741700 | 4.48182700  | C                                       | -4.35645100 | 3.80224600  | -0.22701800 |
| H  | -3.54586700 | 0.25457600  | 5.64138400  | H                                       | -4.95649800 | 1.96270300  | -1.13964700 |
| C  | -1.76437600 | -0.52140500 | -6.60875200 | H                                       | 3.11276000  | 3.87607400  | 1.51789400  |
| C  | -7.75250700 | -1.13376500 | 2.74866600  | C                                       | 1.59787000  | 5.13904200  | 0.65722400  |
| H  | -8.14350000 | 0.89169300  | 2.15805300  | H                                       | 0.62965000  | 2.05959400  | -1.46096300 |
| H  | -4.95445600 | 1.88749600  | 0.97524600  | C                                       | 0.17908000  | 4.10922100  | -0.98489800 |
| H  | -5.96455500 | 1.41929000  | -0.37844900 | H                                       | 2.36137800  | -2.19978800 | -1.56921400 |
| H  | -6.66865900 | 2.29195500  | 0.97849500  | H                                       | 2.97865700  | -3.64763900 | -0.76505900 |
| H  | -7.07326300 | -3.12501600 | 3.15404700  | H                                       | 4.09144100  | -2.36477500 | -1.24090200 |
| H  | -4.31364100 | -3.36312600 | 0.86583300  | C                                       | -0.02740100 | -5.17220700 | -0.19533800 |
| H  | -3.83028600 | -3.06211200 | 2.52684700  | H                                       | 0.47173800  | -4.53469200 | -2.17977800 |
| H  | -5.17219900 | -4.14613500 | 2.19073300  | H                                       | -0.53241200 | -1.34944300 | -2.26366400 |
| H  | -1.51616400 | -1.01842300 | 6.25677500  | H                                       | -0.52394900 | -2.74456000 | -3.34206500 |
| H  | -0.98854400 | -1.24174800 | -6.87242800 |                                         |             |             |             |



## Supporting Information

|                                        |              |              |             |   |             |             |             |
|----------------------------------------|--------------|--------------|-------------|---|-------------|-------------|-------------|
| H                                      | -2.05080900  | -2.06831300  | -2.76515400 | C | -4.30069000 | 2.42267300  | -0.45152300 |
| H                                      | -0.73894300  | -5.53947100  | 1.79699300  | H | 4.66751100  | 2.38618900  | 0.33590300  |
| H                                      | -2.19917400  | -4.15730700  | 3.01360900  | C | 2.34028700  | 3.96988900  | 0.91134500  |
| H                                      | -2.33458200  | -2.46833500  | 2.52144600  | C | 0.90350200  | 3.00979700  | -0.77368300 |
| H                                      | -3.54238700  | -3.63071700  | 2.00504700  | H | 5.21782200  | -0.31399200 | 0.55973800  |
| C                                      | -7.69012700  | -0.15522200  | -1.39038400 | H | 1.88892200  | -2.09734600 | 0.76243600  |
| C                                      | -5.58294700  | -0.71634500  | -2.64324500 | H | 3.57563100  | -2.28639900 | 1.23360500  |
| C                                      | -7.69770000  | 0.14121600   | 0.98688000  | C | 3.21850100  | -2.52169900 | -0.88613700 |
| C                                      | -5.60176900  | -0.10391400  | 2.35553900  | C | -0.17252900 | -4.39146100 | -1.29373700 |
| C                                      | -3.49403100  | 4.42535500   | 0.66457400  | C | -1.04606100 | -2.36186700 | -2.49546000 |
| H                                      | -1.88094200  | 4.14855100   | 2.05687700  | C | -0.85134400 | -4.91880400 | 0.93985600  |
| H                                      | -5.08104600  | 4.38705300   | -0.78002000 | C | -2.48990300 | -3.48432200 | 2.19677800  |
| H                                      | 1.87971000   | 6.00147900   | 1.24821100  | C | -6.32176300 | -0.46165600 | -1.41061600 |
| C                                      | 0.53559800   | 5.22001700   | -0.23258400 | C | -6.33350700 | -0.09774100 | 1.01705300  |
| H                                      | -0.64452900  | 4.16655000   | -1.68652300 | C | -2.59983400 | 3.67386300  | 1.35388700  |
| C                                      | 0.90437300   | -6.34007300  | -0.20405000 | H | -1.77626000 | 1.72264400  | 1.69915000  |
| C                                      | -8.39113700  | 0.12942400   | -0.21897200 | C | -4.38746300 | 3.78999600  | -0.24512900 |
| H                                      | -8.21702200  | -0.16458800  | -2.33861800 | H | -4.95760500 | 1.94724500  | -1.16829900 |
| H                                      | -4.65450500  | -0.14485500  | -2.70848800 | H | 3.14627600  | 3.85954000  | 1.62584300  |
| H                                      | -5.30803700  | -1.77133500  | -2.70778400 | C | 1.67659500  | 5.17951800  | 0.77779400  |
| H                                      | -6.18857300  | -0.47976000  | -3.51564900 | H | 0.62928600  | 2.16794500  | -1.39731500 |
| H                                      | -8.23139500  | 0.35435500   | 1.90671900  | C | 0.23879100  | 4.22012000  | -0.88845200 |
| H                                      | -4.96317000  | -0.98129000  | 2.47403300  | H | 2.53924300  | -2.14653700 | -1.65262900 |
| H                                      | -4.95413800  | 0.77283000   | 2.44065300  | H | 3.10402400  | -3.60351500 | -0.83078500 |
| H                                      | -6.29870900  | -0.07729400  | 3.19046300  | H | 4.23889300  | -2.31119900 | -1.20648100 |
| H                                      | -3.54889200  | 5.49656300   | 0.81557800  | C | -0.09033200 | -5.22840100 | -0.18593800 |
| H                                      | -0.01376900  | 6.14716800   | -0.33997100 | H | 0.40857500  | -4.62342000 | -2.18000700 |
| H                                      | 1.64498600   | -6.26175400  | 0.59472500  | H | -0.58609000 | -1.39113100 | -2.28420000 |
| H                                      | 0.37126600   | -7.27862300  | -0.04099300 | H | -0.52418400 | -2.79948600 | -3.34384800 |
| H                                      | 1.43996800   | -6.41968700  | -1.14890100 | H | -2.07442000 | -2.15891800 | -2.80000200 |
| C                                      | -9.85947400  | 0.39998200   | -0.26502900 | H | -0.79931200 | -5.56173500 | 1.81192800  |
| H                                      | -10.09864000 | 1.17368500   | -0.99614000 | H | -2.23125400 | -4.14353000 | 3.02249400  |
| H                                      |              | -10.41412000 | -0.49199600 | H | -2.32922600 | -2.45528800 | 2.52655300  |
| 0.56416100                             |              |              |             | H | -3.55929500 | -3.59412200 | 2.00774500  |
| H                                      | -10.24145700 | 0.71866300   | 0.70338900  | C | -7.68309300 | -0.19203900 | -1.42877200 |
|                                        |              |              |             | C | -5.57862600 | -0.80380300 | -2.66046400 |
| [Ag(NHC)(MIC)] <sup>+</sup> in benzene |              |              |             | C | -7.69783600 | 0.16225300  | 0.93841000  |
| 1 1                                    |              |              |             | C | -5.61149300 | -0.05632200 | 2.32355900  |
| Ag                                     | -0.01677100  | -0.03802900  | 0.21397900  | C | -3.54278800 | 4.41842300  | 0.65877900  |
| C                                      | -2.05451300  | -0.53600200  | 0.08309000  | H | -1.93657800 | 4.15708400  | 2.06027000  |
| C                                      | 2.04290800   | 0.42452900   | 0.30163200  | H | -5.11828800 | 4.36712300  | -0.79716200 |
| N                                      | -2.52616700  | -1.80166900  | -0.11075700 | H | 1.97978300  | 6.02276600  | 1.38485700  |
| C                                      | -3.21896000  | 0.22256400   | 0.07019000  | C | 0.62487500  | 5.30704800  | -0.11794300 |
| N                                      | 2.64292800   | 1.64643400   | 0.25677600  | H | -0.57910200 | 4.31308800  | -1.59198000 |
| N                                      | 3.07041100   | -0.44209400  | 0.42991100  | C | 0.79932600  | -6.42916100 | -0.19383500 |
| N                                      | -3.84552800  | -1.90641300  | -0.23751100 | C | -8.38812800 | 0.12288500  | -0.26790400 |
| C                                      | -1.72347000  | -2.99671100  | -0.15339400 | H | -8.20800800 | -0.22992800 | -2.37712000 |
| N                                      | -4.25812500  | -0.65330000  | -0.12656500 | H | -4.64941300 | -0.23722000 | -2.75447300 |
| C                                      | -3.36004900  | 1.66336300   | 0.24914700  | H | -5.30572900 | -1.86067800 | -2.68256700 |
| C                                      | 4.01727000   | 1.53066800   | 0.36441800  | H | -6.18337500 | -0.60082900 | -3.54159300 |
| C                                      | 1.94984900   | 2.88789800   | 0.13276300  | H | -8.23488600 | 0.39577000  | 1.85104800  |
| C                                      | 4.28391700   | 0.21130600   | 0.46704400  | H | -4.97399900 | -0.93113100 | 2.46389400  |
| C                                      | 2.91766800   | -1.89752600  | 0.45608200  | H | -4.96838900 | 0.82397500  | 2.40063300  |
| C                                      | -0.98486500  | -3.26130400  | -1.30497500 | H | -6.31358600 | -0.01922800 | 3.15348700  |
| C                                      | -1.68334000  | -3.80759400  | 0.98200400  | H | -3.61838600 | 5.48641600  | 0.82035000  |
| C                                      | -5.67647500  | -0.39881300  | -0.17405000 | H | 0.10713800  | 6.25261200  | -0.21650100 |
| C                                      | -2.50589900  | 2.30834400   | 1.15050400  | H | 1.53863700  | -6.38390000 | 0.60836600  |

## Supporting Information

|   |              |             |             |            |              |             |            |
|---|--------------|-------------|-------------|------------|--------------|-------------|------------|
| H | 0.23183100   | -7.34825100 | -0.03906000 | H          | -10.40998500 | -0.50821700 | -          |
| H | 1.33585600   | -6.52722000 | -1.13602300 | 0.60227500 |              |             |            |
| C | -9.85646500  | 0.39079000  | -0.32407700 | H          | -10.24238800 | 0.73136000  | 0.63489300 |
| H | -10.09664700 | 1.14761500  | -1.07186100 |            |              |             |            |

## 5. References

- 1 C. Mejuto, G. Guisado-Barrios and E. Peris, *Organometallics*, 2014, **33**, 3205-3211.
- 2 S. H. Lim and S. M. Cohen, *Inorg. Chem.*, 2013, **52**, 7862-7872.
- 3 O. V. Dolomanov, L. J. Bourhis, R. J. Gildea, J. A. K. Howard and H. Puschmann, *J. Appl. Crystallogr.*, 2009, **42**, 339-341.
- 4 G. M. Sheldrick, *Acta Crystallogr. A*, 2008, **64**, 112-122.
- 5 M. J. Frisch, G. W. Trucks, H. B. Schlegel, G. E. Scuseria, M. A. Robb, J. R. Cheeseman, G. Scalmani, V. Barone, B. Mennucci, G. A. Petersson, H. Nakatsuji, M. Caricato, X. Li, H. P. Hratchian, A. F. Izmaylov, J. Bloino, G. Zheng, J. L. Sonnenberg, M. Hada, M. Ehara, K. Toyota, R. Fukuda, J. Hasegawa, M. Ishida, T. Nakajima, Y. Honda, O. Kitao, H. Nakai, T. Vreven, J. A. Montgomery Jr., J. E. Peralta, F. Ogliaro, M. Bearpark, J. J. Heyd, E. Brothers, K. N. Kudin, V. N. Staroverov, R. Kobayashi, J. Normand, K. Raghavachari, A. Rendell, J. C. Burant, S. S. Iyengar, J. Tomasi, M. Cossi, N. Rega, J. M. Millam, M. Klene, J. E. Knox, J. B. Cross, V. Bakken, C. Adamo, J. Jaramillo, R. Gomperts, R. E. Stratmann, O. Yazyev, A. J. Austin, R. Cammi, C. Pomelli, J. W. Ochterski, R. L. Martin, K. Morokuma, V. G. Zakrzewski, G. A. Voth, P. Salvador, J. J. Dannenberg, S. Dapprich, A. D. Daniels, Ö. Farkas, J. B. Foresman, J. V. Ortiz, J. Cioslowski and D. J. Fox, *Gaussian 09, Revision*, Gaussian, Inc., Wallingford, CT, 2009.
- 6 Y. Zhao and D. G. Truhlar, *J. Chem. Phys.*, 2006, **125**, 194101-194118.
- 7 F. Weigend and R. Ahlrichs, *Physical Chemistry Chemical Physics*, 2005, **7**, 3297-3305.
- 8 A. Schafer, C. Huber and R. Ahlrichs, *J. Chem. Phys.*, 1994, **100**, 5829-5835.
- 9 A. V. Marenich, C. J. Cramer and D. G. Truhlar, *J. Phys. Chem. B*, 2009, **113**, 6378-6396.
- 10 a) R. L. Martin, P. J. Hay and L. R. Pratt, *J. Phys. Chem. A*, 1998, **102**, 3565-3573; b) N. Sieffert and M. Buhl, *Inorg. Chem.*, 2009, **48**, 4622-4624.
